# Supplementary material for: A solution based route to GaAs thin films from As(NMe2)3 and GaMe3 for solar cells
Source: Royal Society of Chemistry journal article supplement (doi:10.1039/c4ra13902j), 2015-01-01
Supplement: c4ra13902j1.pdf [file c4ra13902j1.pdf]

Supporting Information

a)

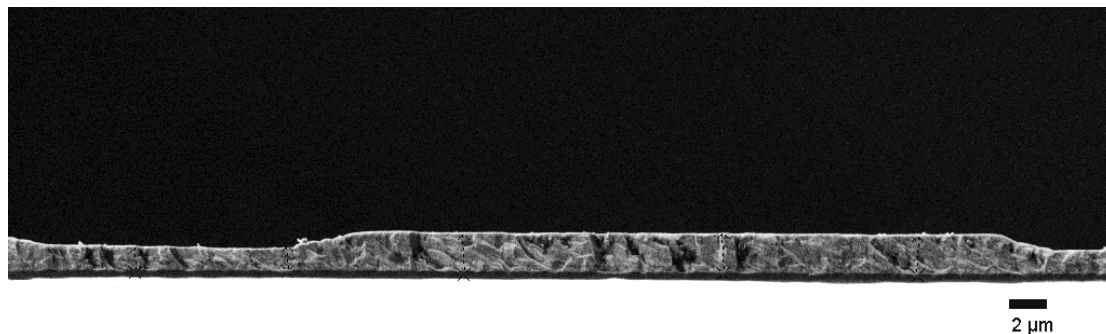

b)

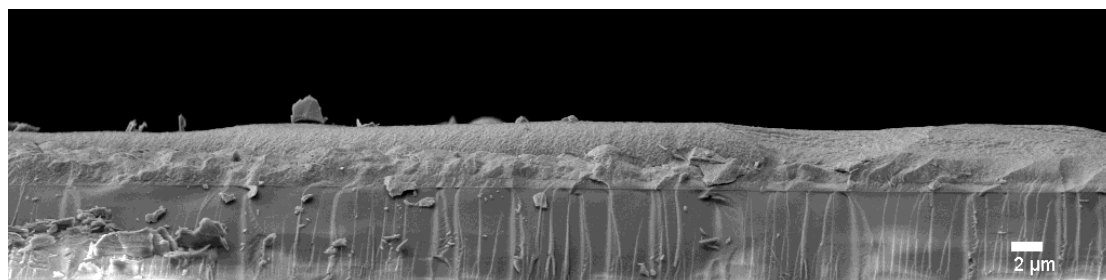

**Figure 1:** Side on SEM images of the AACVD film grown at (a) 500 °C and (b) 550 °C. The thickness of the film grown at 500 °C (a) is between 1-2 μm while the thickness of the 550 °C (b) ranges between 3 to 4 μm.
